# Supplementary material
Source: MDPI journal article supplement (https://www.mdpi.com/2673-4125/1/2/7)
Supplement: s1 [file s1]

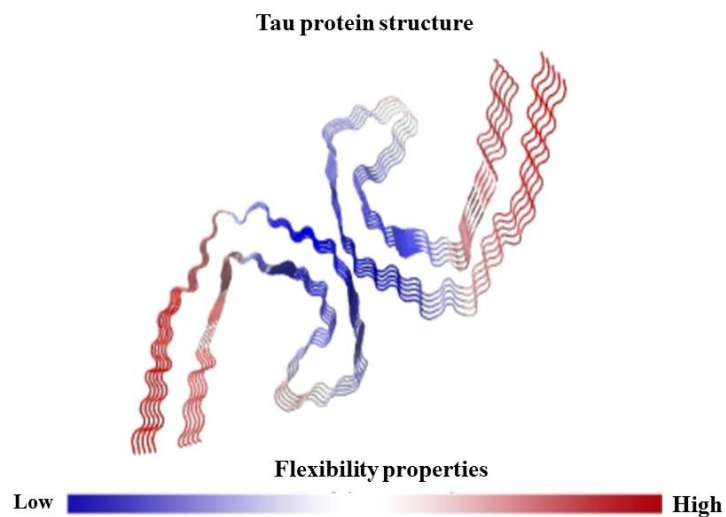

**Figure S1.** Schematic representation of the tau protein flexibility properties. On the bottom the colored bar is to represent the size of fluctuations of the tau protein residues showing from low-flexibility (blue) to high-flexibility (red). Note that the best ranked binding site ID:1 presents intrinsic rigidity (blue) simulated in physiological conditions.
